# Supplementary material for: Lycopene ameliorates atrazine-induced pyroptosis in spleen by suppressing the Ox-mtDNA/Nlrp3 inflammasome pathway
Source: Royal Society of Chemistry journal article supplement (doi:10.1039/d1fo02857j), 2021-11-19
Supplement: d1fo02857j1.pdf [file d1fo02857j1.pdf]

# **Lycopene Ameliorates Atrazine-Induced Pyroptosis in Spleen *via* Suppressing the Ox-mtDNA/Nlrp3 Inflammasome Pathway**

Shi-Yong Zhu<sup>a</sup>, Jian-Ying Guo<sup>a</sup>, Jin-Yang Li<sup>a</sup>, Xue-Yan Dai<sup>a</sup>, Xue-Nan Li<sup>a</sup>, Jin-Long Li<sup>a, b, c, \*</sup>

---

*\*Corresponding author.*

<sup>a</sup>College of Veterinary Medicine, Northeast Agricultural University, Harbin, 150030, P. R. China. E-mail: [Jinlongli@neau.edu.cn](mailto:Jinlongli@neau.edu.cn) Tel: +86 451 55190407.

<sup>b</sup>Heilongjiang Key Laboratory for Laboratory Animals and Comparative Medicine, Northeast Agricultural University, Harbin, 150030, P. R. China.

<sup>c</sup>Key Laboratory of the Provincial Education Department of Heilongjiang for Common Animal Disease Prevention and Treatment, Northeast Agricultural University, Harbin, 150030, P. R. China

**Fig. S1 Schematic diagram illustrating the western blot in the study.**

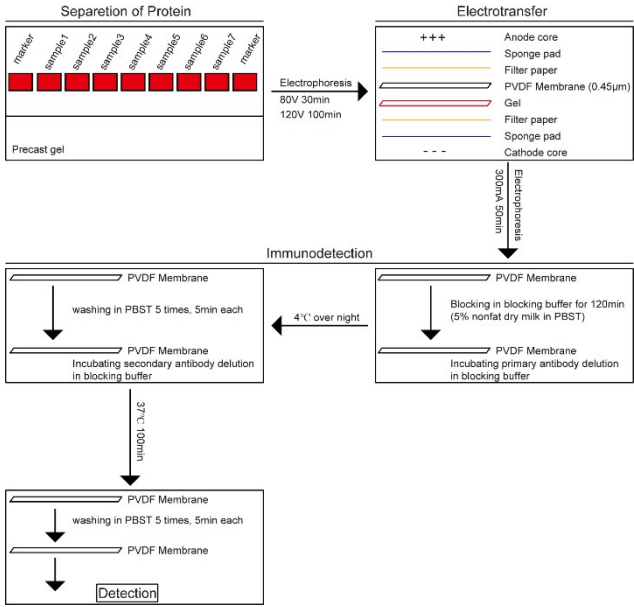

**Fig. S2 Apoptosis of spleen with ATZ exposure and/or Lyc treatment in spleen of mice. Black arrow indicated that TUNEL labeled splenocytes in each group.**

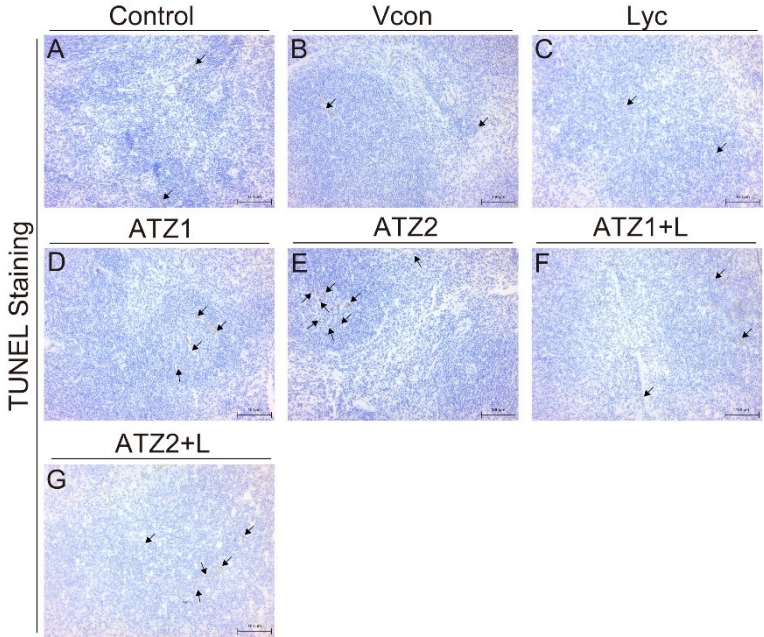

**Fig. S3 The expression of Nfkb with ATZ exposure and/or Lyc treatment in spleen of mice. (A-G)**

Immunostaining of Nfkb in spleen with ATZ exposure and/or Lyc treatment. (H) Statistical analysis of Nfkb

labeled cells in spleen. (I) Protein level of Nfkb. Data were presented as the mean  $\pm$  SEM. Asterisks (\*)

indicated the significance differences between the control and another groups (\* $p < 0.05$ , \*\* $p < 0.01$ , \*\*\* $p$

$< 0.001$ ). Octothorpe (#) indicate the significance differences between the two groups (# $p < 0.05$ , ## $p < 0.01$ ,

### $p < 0.001$ ).

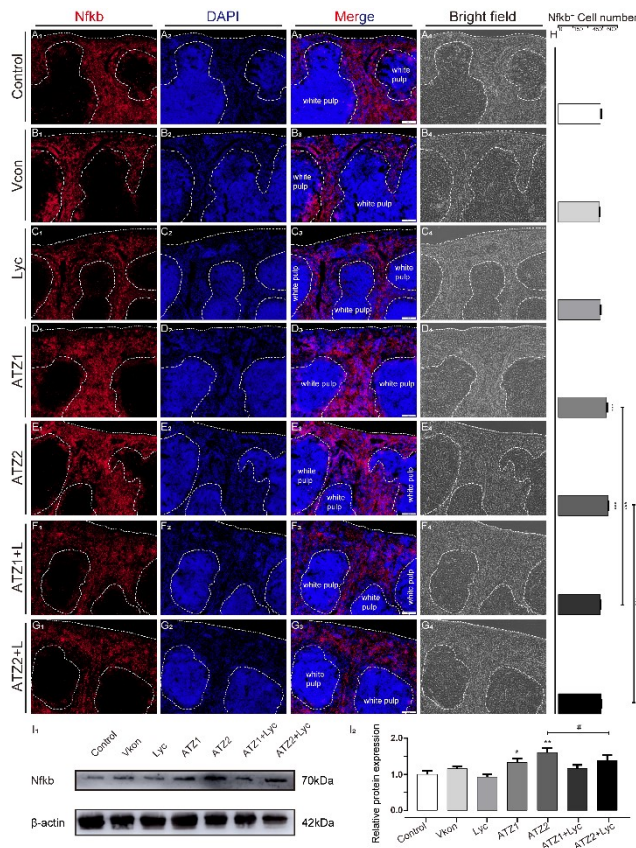

**Fig. S4 Original western blot gels used in the study.**

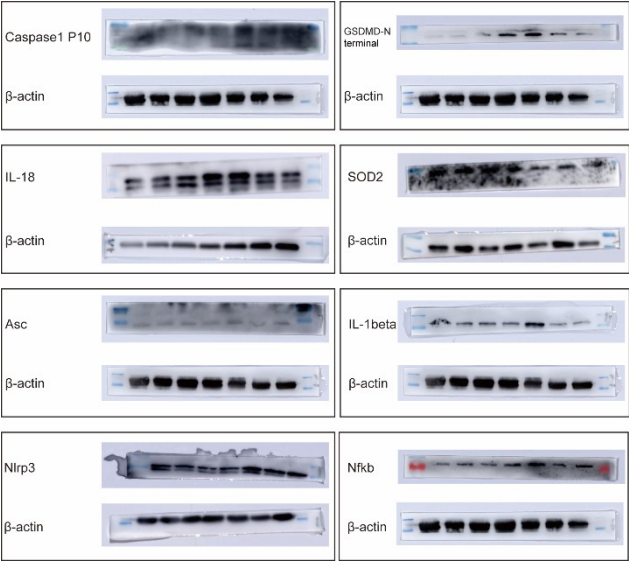

Table S1 The

primers used

| for qPCR | Name     | Primers                                                               | analysis |
|----------|----------|-----------------------------------------------------------------------|----------|
|          | Actb     | F: 5'-GTGACGTTGACATCCGTAAAGA-3'<br>R: 5'-GCCGGACTCATCGTACTCC-3'       |          |
|          | Gapdh    | F: 5'-CGTGCCGCCTGGAGAAACCTG-3'<br>R: 5'-AGAGTGGGAGTTGCTGTTGAAGTCG-3'  |          |
|          | Irf1     | F: 5'-ATGCCAATCACTCGAATGCG-3'<br>R: 5'-CCTGCTTTGTATCGGCCTGT-3'        |          |
|          | Mff      | F: 5'-ATGCCAGTGTGATAATGCAAGT-3'<br>R: 5'-CTCGGCTCTCTTCGCTTTG-3'       |          |
|          | Mfn1     | F: 5'-CCTACTGCTCCTTCTAACCCA-3'<br>R: 5'-AGGGACGCCAATCCTGTGA-3'        |          |
|          | Mfn2     | F: 5'-CTGGGGACCGGATCTTCTTC-3'<br>R: 5'-CTGCCTCTCGAAATTCTGAAACT-3'     |          |
|          | Nrf1     | F: 5'-TATGGCGGAAGTAATGAAAGACG-3'<br>R: 5'-CAACGTAAGCTCTGCCTTGTT-3'    |          |
|          | Opa1     | F: 5'-TGGAAAATGGTTCGAGAGTCAG-3'<br>R: 5'-CATTCCGTCTCTAGGTTAAAGCG-3'   |          |
|          | Sirt1    | F: 5'-TGATTGGCACCGATCCTCG-3'<br>R: 5'-CCACAGCGTCATATCATCCAG-3'        |          |
|          | Sirt3    | F: 5'-GGCTCTATACACAGAACATCGAC-3'<br>R: 5'-TAGCTGTTACAAAGGTCCCGT-3'    |          |
|          | Tfam     | F: 5'-ATTCCGAAGTGTTCCTCCAGCA-3'<br>R: 5'-TCTGAAAGTTTTGCATCTGGGT-3'    |          |
|          | D-loop   | F: 5'-AATCTACCATCCTCCGTGAAACC-3'<br>R: 5'-TCAGTTTAGCTACCCCAAGTTTAA-3' |          |
|          | non-NUMT | F: 5'-CTAGAAACCCCGAAACAAA-3'<br>R: 5'-CCAGCTATCACCAAGCTCGT-3'         |          |
|          | B2m      | F: 5'-ATGGGAAGCCGAACATACTG-3'<br>R: 5'-CAGTCTCAGTGGG GGTGAAT-3'       |          |
|          | Tert     | F: 5'-CTAGCTCATGTGTCAAGACCCTCTT-3'<br>R: 5'-GCCAGCACGTTTCTCTCGTT-3'   |          |
